# Supplementary material for: Effect of an anionic surfactant (SDS) on the photoluminescence of graphene oxide (GO) in acidic and alkaline medium
Source: Royal Society of Chemistry journal article supplement (doi:10.1039/c7ra12024a), 2018-01-01
Supplement: c7ra12024a1.pdf [file c7ra12024a1.pdf]

## Supporting Information

### **Effect of an anionic surfactant (SDS) on the Photoluminescence of Graphene Oxide (GO) in acidic and alkaline medium**

Prosenjit Saha<sup>1</sup>, Dinesh Kumar Pyne<sup>1</sup>, Srijon Ghosh<sup>2</sup>, Soumadip Banerjee<sup>2</sup>, Sourav Das<sup>3</sup>,  
Soumen Ghosh<sup>3</sup>, Partha Dutta\*<sup>4</sup> and Arnab Halder\*<sup>1</sup>

<sup>1</sup> Department of Chemistry, Presidency University, Kolkata – 700073, India,

<sup>2</sup> Indian Association for the Cultivation of Science, Jadavpur, Kolkata – 700 032, India

<sup>3</sup> Centre for Surface Science, Physical Chemistry Section, Department of Chemistry,  
Jadavpur University, Kolkata-700032, India

<sup>4</sup> Department of Chemistry, Maharaja Manindra Chandra College, Kolkata – 700003, India

\* Corresponding address: Department of Chemistry, Presidency University,  
Kolkata – 700 073, India. Email: [arnab.chem@presiuniv.ac.in](mailto:arnab.chem@presiuniv.ac.in), Tel. No.: +913340529846

Department of Chemistry, Maharaja Manindra Chandra College, Kolkata – 700003, India.  
E-mail: [par\\_dut@yahoo.com](mailto:par_dut@yahoo.com), Tel. No.: +919433464396

#### **Characterization of Graphene Oxide (GO):**

We have characterized the prepared GO based on modified Hummer's method by Raman, FT-IR, XRD, SEM and TEM as given below:

#### **S1: Raman Spectra, FT-IR and XRD:**

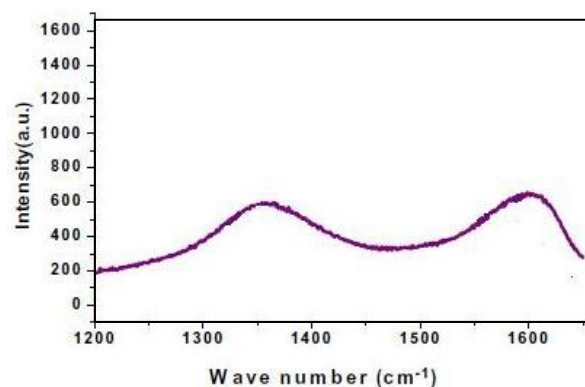

**Fig. S1 (a) Raman Spectra of GO**

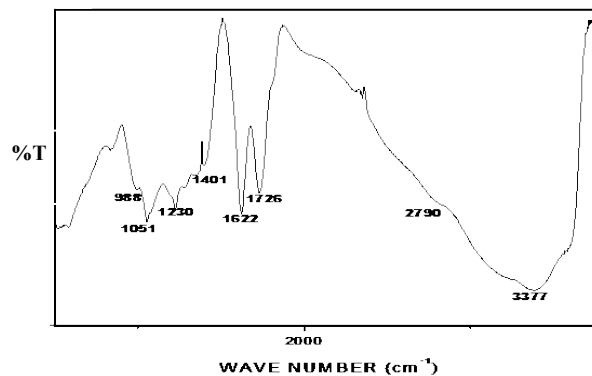

**(b) FT-IR Spectrum of GO**

Fig. S1a shows the Raman spectrum of GO. Two peaks were observed at  $1350\text{ cm}^{-1}$  and  $1596\text{ cm}^{-1}$ , named as D band and G band, respectively. First one is a disordered band, associated with the reduction in size of the in-plane  $\text{sp}^2$  domains, due to extensive oxidation. G band arises as a result of first order scattering related to  $\text{sp}^2$  domains due to vibrations of hexagonal lattice of GO and this band near  $1600\text{ cm}^{-1}$  is the characteristic of graphene-like

“honeycomb” structure. The FT-IR spectrum indicates the presence of C=O groups in the form of free carboxylic acid and hydrogen bonded carboxylic acid moieties by showing two sharp peaks at 1,726 and 1622  $\text{cm}^{-1}$  respectively, due to the weakening of carbonyl bond in the later case (Fig. S1b). A broad peak having a center at  $\sim 3,380 \text{ cm}^{-1}$  is appeared mainly due to the –OH stretching mode of vibration, indicating the presence of numerous surface hydroxyl groups on GO (Fig. S1b).

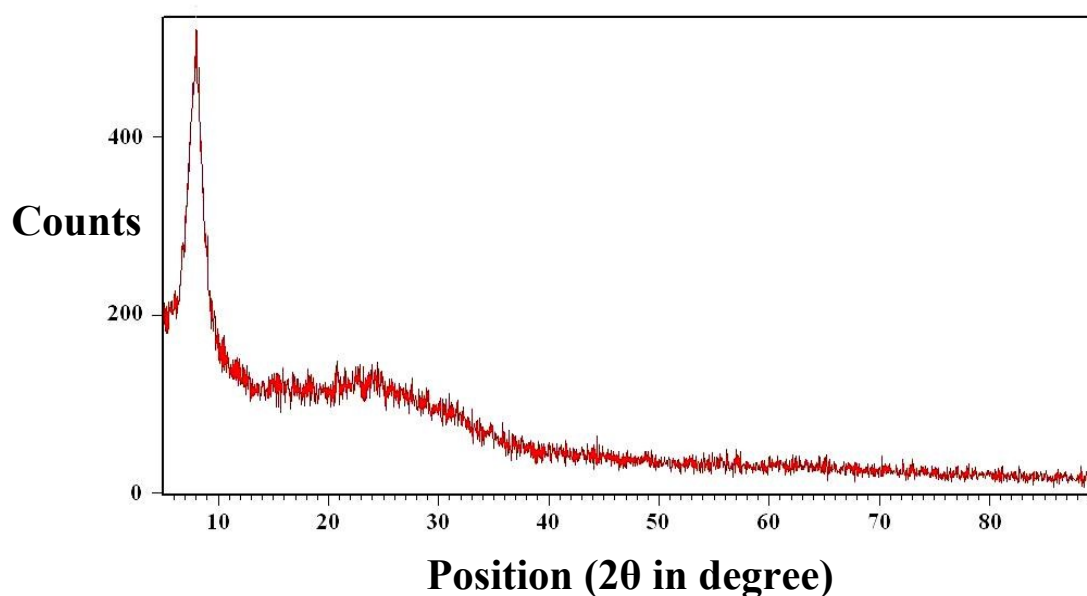

**Fig. S1 (c) X-ray diffraction pattern of Graphene Oxide**

**(peak position -  $2\theta = 7.9715^\circ$ ,  $\lambda=1.5418 \text{ \AA}$ )**

XRD data shows that our modified GO exhibits a 001 reflection at  $7.97^\circ$  corresponding to interlayer spacing of 1.11 nm (Fig. S1c). This value is higher than interlayer spacing of graphite flakes due to the presence of oxygenated functional groups.

### **S2: Scanning electron microscopic (SEM) Image:**

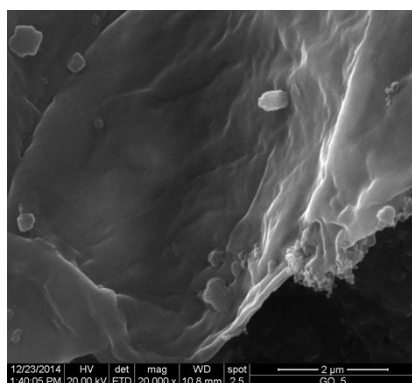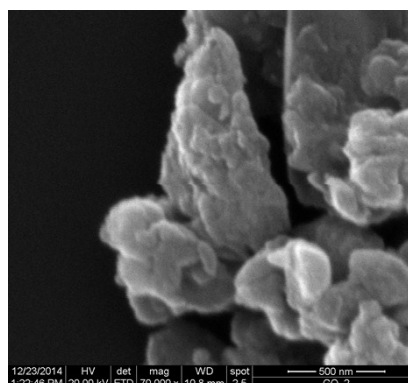

**Fig. S2 (a) SEM Image of GO: 2μm**

**(b) SEM micrograph of GO: 500 nm**

**S3: Tunneling Electron Microscope (TEM) Image:**

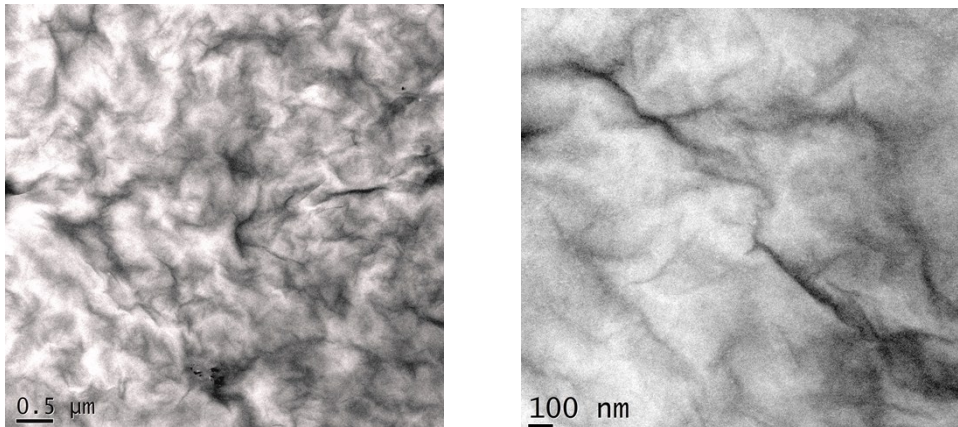

**Fig. S3 (a) TEM image of GO: 0.5 μm**

**(b) TEM image of GO: 100 nm**

The SEM and TEM images of GO displayed an exfoliated layer of several micrometers, a curled morphology (Fig. S2 and S3).
